# Supplementary material for: Newborn mice form lasting CA2-dependent memories of their mothers
Source: PubMed Central journal article supplement — Cell Rep. Author manuscript; Available in PMC 2021 Mar 23. (PMC7985754; doi:10.1016/j.celrep.2020.108668), 2021-01-26
Supplement: NIHMS1679502-supplement-1.pdf [file NIHMS1679502-supplement-1.pdf]

**Cell Reports, Volume 34**

**Supplemental Information**

**Newborn mice form lasting CA2-dependent  
memories of their mothers**

**Blake J. Laham, Emma J. Diethorn, and Elizabeth Gould**

## Supplemental figures and table

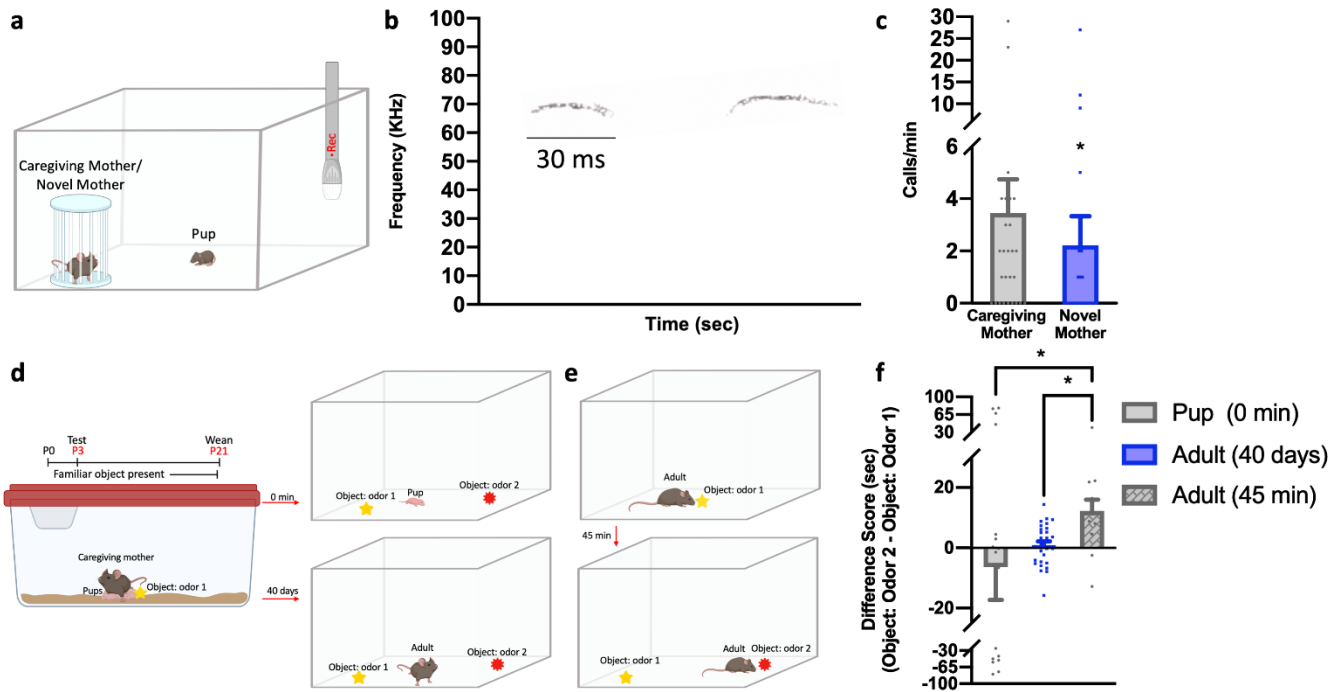

**Figure S1: Mouse pups emit more USV calls when in the presence of the caregiving mother compared to a novel mother, and do not display a familiarity preference for objects.** Related to Figure 1.

(A) Schematic of pup exposed to a caregiving mother or novel mother while USVs are recorded. (B) Sample pup's USV whistle taken from USV spectrogram. (C) Call numbers are higher when pups are in the vicinity of caregiving mothers versus novel mothers ( $n=27$ ) ( $p=0.0249$ , Wilcoxon matched pairs signed rank test). (D) Schematic of mouse pups reared in a home cage with a distinct odor object (object: odor 1) present until weaning. Familiarity preference for objects was tested on P3 ( $n=19$ ) by assessing behavior in a two-choice test with object: odor 1 and a novel object: odor 2. A similar test was performed again at P60 ( $n=29$ ), after mice had been separated from object: odor 1 for 40 days. Objects were counterbalanced across litters. (E) To verify that object memory was intact, mice were exposed to object: odor 1 at P60 and after a brief delay (45 min) tested for novelty preference with a two-choice test with object: odor 1 and object: odor 2 ( $n=12$ ). (F) Pups showed no preference for the object present in the nest or the novel object. Adults showed no preference for either object after a 40 day interval between exposure to the first object and the test, but show a difference in object investigation with a short interval between object exposure and test ( $H(2, 57) = 10.03$ ,  $p=0.0066$ , Dunn's post hoc tests: P3 vs P60 (40 days),  $p=0.7689$ ; P3 vs P60 (45 min),  $p=0.0051$ ; P60 (40 days) vs P60 (45 min),  $p=0.0500$ ). \*  $p < 0.05$  compared to either caregiving mother exposure for the USV experiment or groups within brackets for the object preference experiment; bars represent mean + SEM.

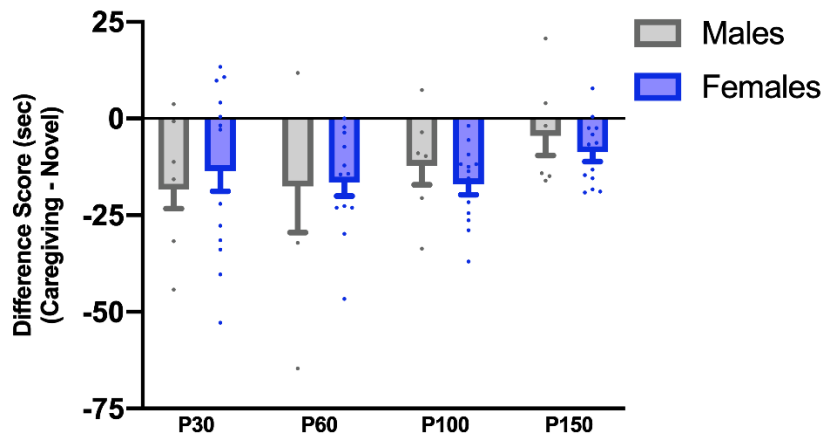

**Figure S2: Postweaning males and females display similar preference for a novel mother over the caregiving mother.** Related to Figure 1.

Postweaning males and females spend more time investigating a novel mother compared to the caregiving mother at all ages examined. No significant sex differences were observed at any time point ( $F(3, 76) = 0.4063, p=0.7489$ , post hoc tests: P30 males ( $n=9$ ) vs females ( $n=15$ ),  $p=0.9268$ ; P60 males ( $n=7$ ) vs females ( $n=13$ ),  $p=0.9999$ ; P100 males ( $n=7$ ) vs females ( $n=13$ ),  $p=0.9524$ ; P150 males ( $n=7$ ) vs females ( $n=13$ ),  $p=0.9670$ ; bars represent mean + SEM.

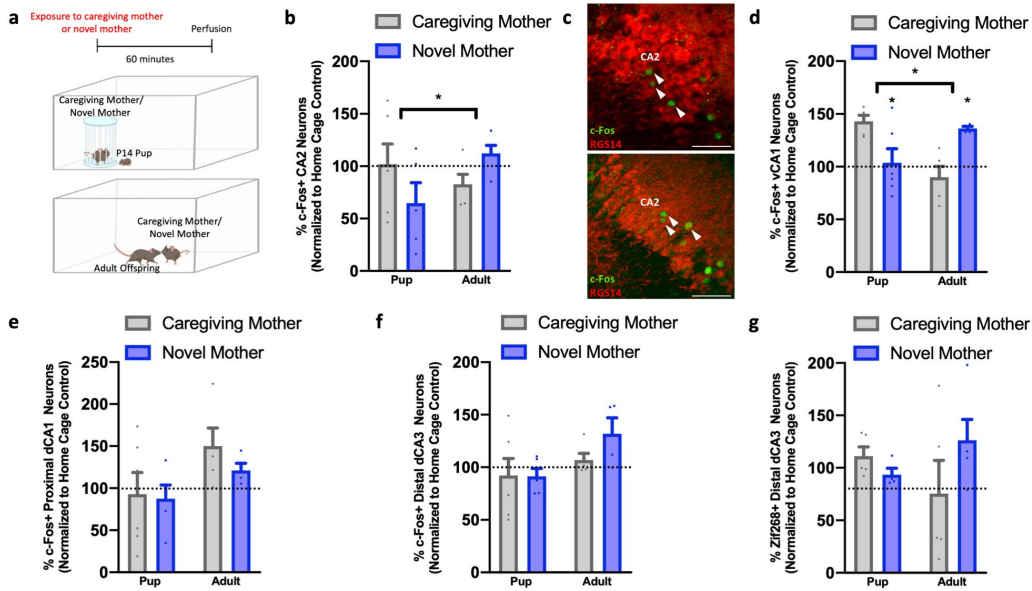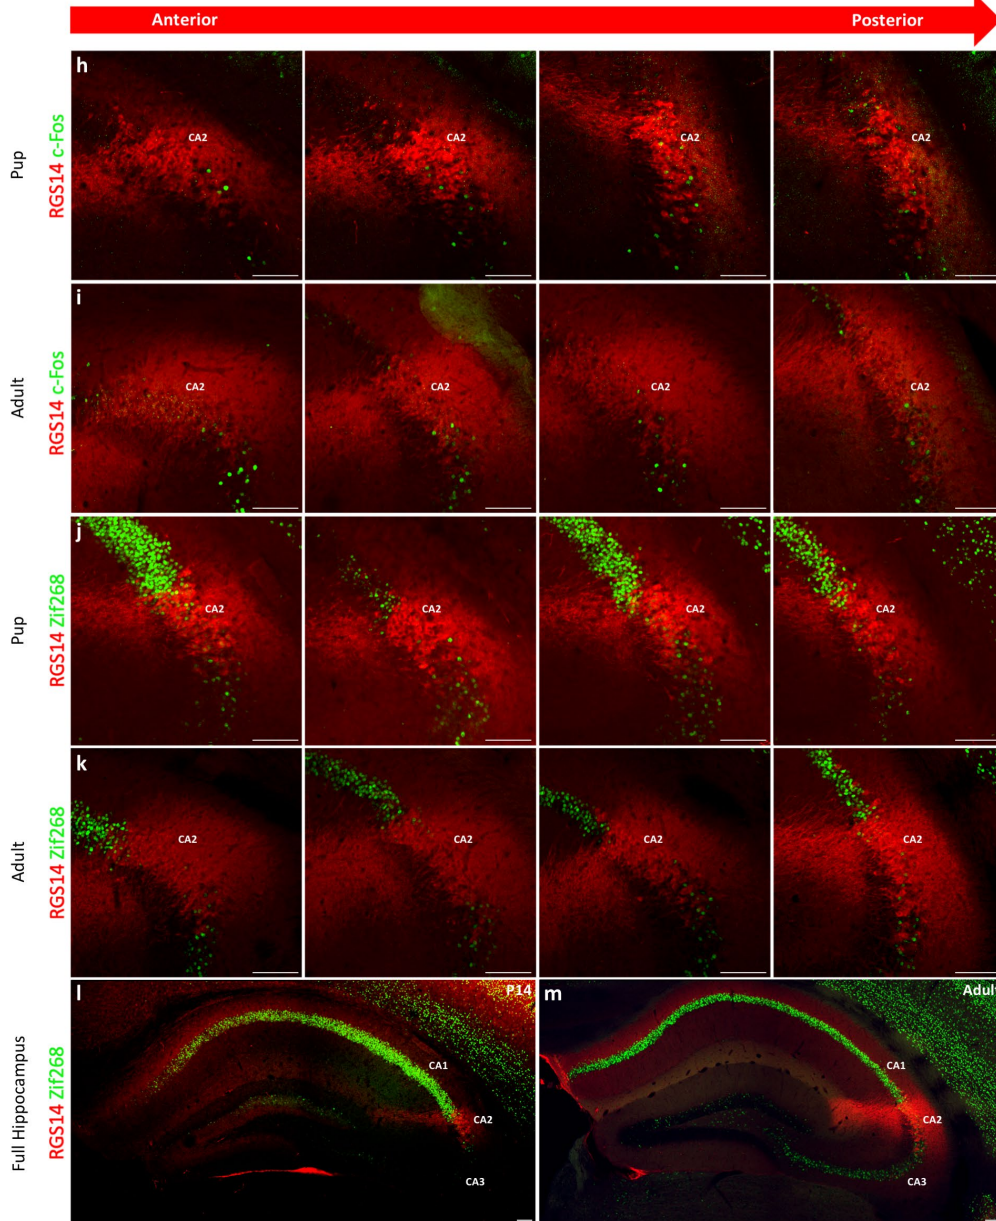

**Figure S3: Exposure to the caregiving mother compared to a novel mother alters IEG+ cell number in the CA2 and ventral CA1, but not in the dorsal CA1 or dorsal CA3.** Related to Figure 1. (A) Timeline and schematic of P14 pup or adult offspring exposure to the caregiving mother or novel mother for immediate early gene experiment. (B) The number of c-Fos+ cells in the CA2 after exposure to the caregiving mother (P14 n=6; adult n=5) or a novel mother (P14 n=5; adult n=5) at P14 or in adulthood followed a similar pattern as that observed for Zif268 (see Figure 1) ( $F(1,17) = 4.539$ ,  $p=0.0480$ , although post hoc comparisons were not statistically significant, Sidak post hoc tests: novel vs caregiving (P14),  $p=0.1964$ , novel vs caregiving (adult),  $p=0.3760$ ). (C) Confocal images of c-Fos+ cells (green, arrows) in the RGS14 labeled CA2 region (red) from pup (top) and adult (bottom) exposed to a caregiving mother (pup) or novel mother respectively. (D) The number of c-Fos+ cells in the ventral CA1 was increased after exposure to the caregiving mother (n=5) compared to a novel mother (n=5) in pups and decreased after exposure to the caregiving mother (n=6) compared to a novel mother (n=4) in adults ( $F(1,16) = 17.67$ ,  $p=0.0007$ , Sidak post hoc tests: novel vs caregiving (P14),  $p=0.0217$ , novel vs caregiving (adult),  $p=0.0148$ ). (E) No differences were observed in the number of c-Fos+ cells in the proximal dorsal CA1 in pups or adults after exposure to the caregiving mother (P14 n=6; adult n=5) or a novel mother (P14 n=5; adult n=4;  $F(1,16) = 0.3133$ ,  $p=0.5834$ ). (F) No differences were observed in the number of c-Fos+ cells in the distal dorsal CA3 (Caregiving: P14 n=6, adult n=5; Novel: P14 n=5; adult n=4;  $F(1,16) = 1.039$ ,  $p=0.3232$ ). (G) No differences were observed in the number of Zif268+ cells in the distal dorsal CA3 (Caregiving: P14 n=5, adult n=5; Novel: P14 n=4, adult n=5;  $F(1,15) = 2.770$ ,  $p=0.1168$ ). All cell counts were normalized to P14 or adult controls from the same region after home cage exposure. \*  $p < 0.05$  compared to either groups within brackets or compared to mice exposed to caregiving mothers; bars represent mean + SEM. (H) Confocal images of c-Fos+ cells (green) in the CA2 (labeled with RGS14, red) of a P14 pup at different anterior-posterior levels. (I) Confocal images of c-Fos+ cells (green) in the CA2 (labeled with RGS14, red) of an adult mouse at different anterior-posterior levels. (J) Confocal images of Zif268+ cells (green) in the CA2 (labeled with RGS14, red) of a P14 pup at different anterior-posterior levels. (K) Confocal images of Zif268+ cells (green) in the CA2 (labeled with RGS14, red) of an adult mouse at different anterior-posterior levels. (L) Confocal images of Zif268+ cells (green) in the pup (P14) and (M) adult hippocampus showing the Zif268 staining pattern in the CA fields with CA2 delineated by RGS14 (red). Scale bars equal 200  $\mu\text{m}$ .

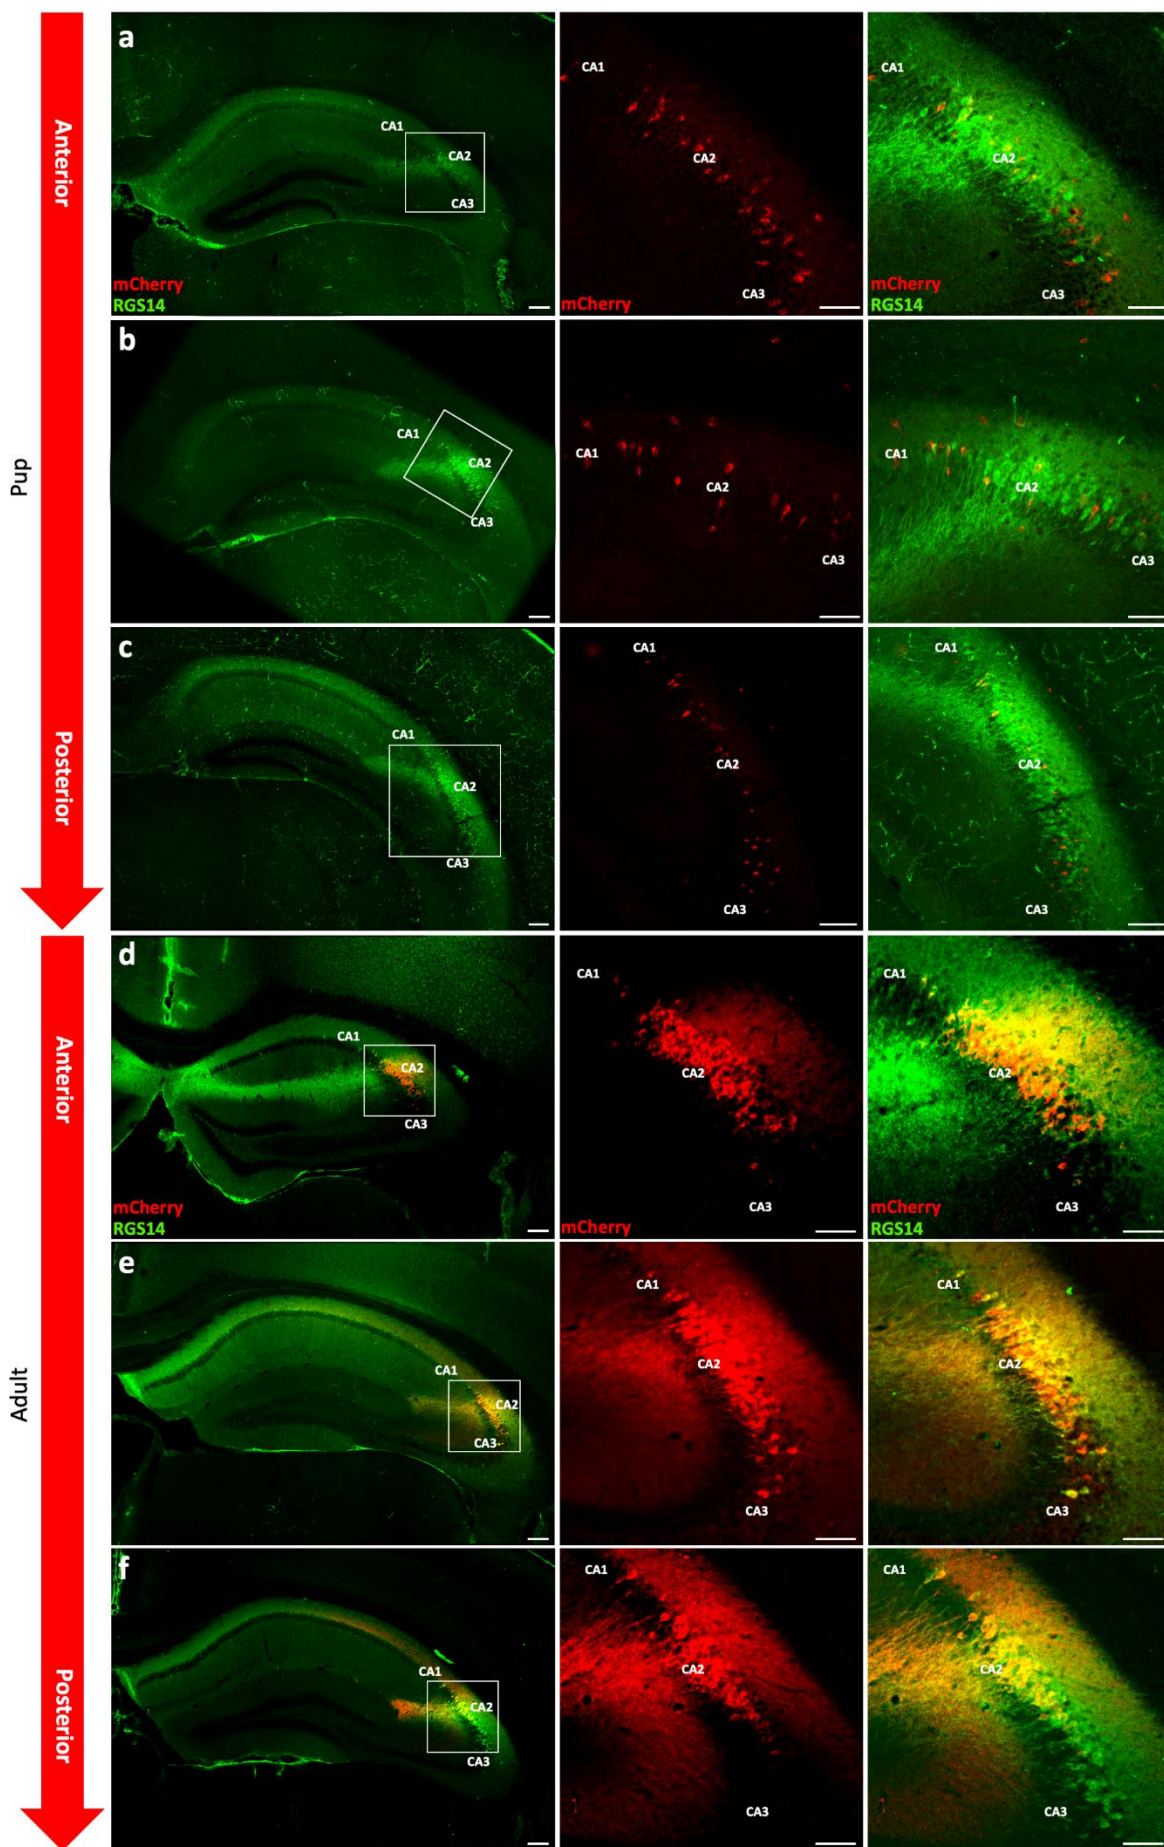

**Figure S4: DREADD virus expression is largely confined to the CA2 region in both pups and adults.** Related to Figures 3-5.

(A-C) Confocal images showing mCherry expression after virus infection (red) of the CA2, delineated by RGS14 (green) in a P12 pup (infected with virus on P3, tested behaviorally on P10 and P12 and then perfused on P12) at different anterior-posterior levels. Labeling was moderate and mostly specific to the CA2. (D-F) Confocal images showing mCherry expression after virus infection (red) in the CA2, delineated by RGS14 (green) in an adult mouse at different anterior-posterior levels. Labeling was robust and largely specific to the CA2. Scale bars equal 200  $\mu\text{m}$ .

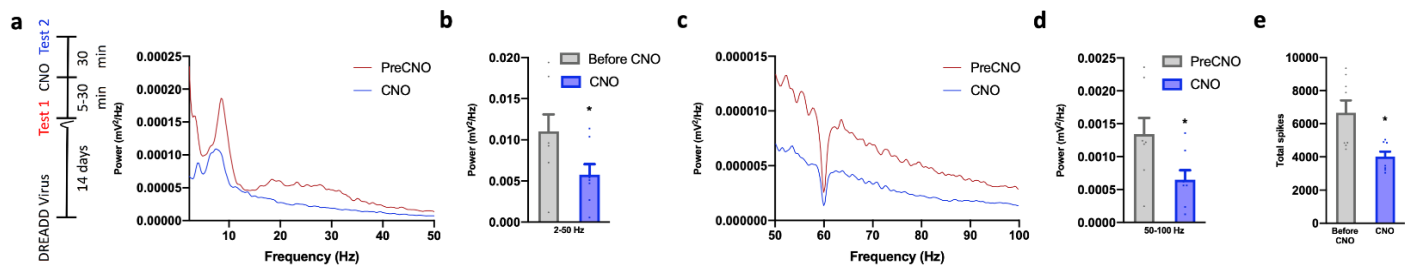

**Figure S5: CNO treatment after DREADD infection decreases local field potential (LFP) power in the CA2 of adult mice.** Related to Figures 4,5.

(A) Timeline for inhibitory DREADD viral infection and CA2 LFP recording from 2 to 50 Hz. (B) Activating inhibitory DREADDs in CA2 with CNO reduces LFP power (2 to 50 Hz) ( $t_{(7)}=6.020$ ,  $p = 0.0005$ ,  $n=8$ ). (C) CA2 LFP recording from 50-100 Hz with 60 Hz notch filter. (D) Activating inhibitory DREADDs in CA2 with CNO reduces LFP power (50 to 100 Hz) ( $t_{(7)} = 6.010$ ,  $p = 0.0005$ ,  $n=8$ ). (E) Activating inhibitory DREADDs in CA2 with CNO reduces total spikes ( $t_{(7)} = 5.697$ ,  $p = 0.0007$ ,  $n=8$ )

Because LFP power is greater at lower frequencies, data are displayed using different y axis ranges.  
 \*  $p < 0.05$ , bars represent mean + SEM.



**Table S1: Post hoc comparisons for statistics in Figures 1, 3, 4 and 5 of the main text**

**Experiment: Preweaning and postweaning caregiving mother/novel mother preference.** Related to Figure 1.

| <u>Tukey's HSD test</u> | <u>p value</u> |
|-------------------------|----------------|
| P3 vs. P6               | 0.9996         |
| P3 vs. P14              | 0.9570         |
| P3 vs. P30              | 0.0005         |
| P3 vs. P60              | 0.0003         |
| P3 vs. P100             | 0.0001         |
| P3 vs. P150             | 0.0142         |
| P6 vs. P14              | 0.8477         |
| P6 vs. P30              | 0.0010         |
| P6 vs. P60              | 0.0006         |
| P6 vs. P100             | 0.0003         |
| P6 vs. P150             | 0.0277         |
| P14 vs. P30             | 0.0013         |
| P14 vs. P60             | 0.0008         |
| P14 vs. P100            | 0.0004         |
| P14 vs. P150            | 0.0116         |
| P30 vs. P60             | 0.9999         |
| P30 vs. P100            | 0.9981         |
| P30 vs. P150            | 0.9850         |
| P60 vs. P100            | >0.9999        |
| P60 vs. P150            | 0.9334         |
| P100 vs. P150           | 0.8591         |

**Experiment: Preweaning and postweaning caregiving mother/novel mother Zif268 CA2.** Related to Figure 2.

| <u>Sidak's multiple comparisons</u> | <u>p value</u> |
|-------------------------------------|----------------|
| Pup                                 | 0.0007         |
| Adult                               | 0.0016         |

**Experiment: DREADD pup caregiving mother/novel mother preference.** Related to Figure 3.

| <u>Sidak's multiple comparisons</u> | <u>p value</u> |
|-------------------------------------|----------------|
| Control virus                       |                |
| Saline vs CNO                       | 0.6499         |
| DREADD virus                        |                |
| Saline vs CNO                       | 0.0234         |

**Experiment: DREADD pup caregiving mother/novel mother total investigation times.** Related to Figure 3.

| <u>Sidak's multiple comparisons</u> | <u>p value</u> |
|-------------------------------------|----------------|
| Control virus                       |                |
| Saline vs CNO                       | 0.9694         |
| DREADD virus                        |                |
| Saline vs CNO                       | 0.9174         |

**Experiment: DREADD adult caregiving mother/novel mother preference.** Related to Figure 4.

| <u>Sidak's multiple comparisons</u> | <u>p value</u> |
|-------------------------------------|----------------|
| Control virus                       |                |
| Saline vs CNO                       | 0.6907         |
| DREADD virus                        |                |
| Saline vs CNO                       | 0.0013         |

**Experiment: DREADD adult caregiving mother/novel mother locomotion.** Related to Figure 4.

| <u>Sidak's multiple comparisons</u> | <u>p value</u> |
|-------------------------------------|----------------|
| Control virus w/caregiving          |                |
| Saline vs CNO                       | >0.9999        |
| Control virus w/novel               |                |
| Saline vs CNO                       | 0.9973         |
| DREADD virus w/caregiving           |                |
| Saline vs CNO                       | >0.9999        |
| DREADD virus w/novel                |                |
| Saline vs CNO                       | >0.9999        |

**Experiment: DREADD adult familiar/novel conspecific preference.** Related to Figure 5.

| <u>Sidak's multiple comparisons</u> | <u>p value</u> |
|-------------------------------------|----------------|
| Control virus                       |                |
| Saline vs CNO                       | 0.6167         |
| DREADD virus                        |                |
| Saline vs CNO                       | 0.0001         |

**Experiment: DREADD adult sociability.** Related to Figure 5.

| <u>Sidak's multiple comparisons</u> | <u>p value</u> |
|-------------------------------------|----------------|
| Control virus                       |                |
| Social vs nonsocial                 | 0.0089         |
| DREADD virus                        |                |
| Social vs nonsocial                 | <0.0001        |
